# Supplementary material for: The Adsorption Behavior of Gas Molecules on Co/N Co–Doped Graphene
Source: MDPI journal article supplement (doi:10.3390/molecules26247700), 2021-12-20
Supplement: s1 [file s1]

**Table S1.** The distance between gas molecules and Co atom ( $d_{\text{Co-gas}}/\text{\AA}$ ), the charge transferred to the gas molecules ( $\Delta Q_{\text{gas}}/e$ ), adsorption energies ( $E_{\text{ad}}/\text{eV}$ ), and the total magnetic moment of the systems ( $M/\mu_B$ ), after gas adsorption.

| Gas                    | $d_{\text{Co-gas}} (\text{\AA})$ | $\Delta Q_{\text{gas}} (e)$ | $E_{\text{ad}} (\text{eV})$ | $M (\mu_B)$ |
|------------------------|----------------------------------|-----------------------------|-----------------------------|-------------|
| $\text{C}_2\text{H}_2$ | 1.92                             | -0.38                       | -1.95                       | 2.00        |
| CO                     | 1.76                             | -0.31                       | -2.27                       | 2.00        |
| $\text{NO}_2$          | 1.92                             | -0.70                       | -3.32                       | 1.00        |
| $\text{SO}_2$          | 1.93                             | -0.71                       | -1.85                       | 0.14        |

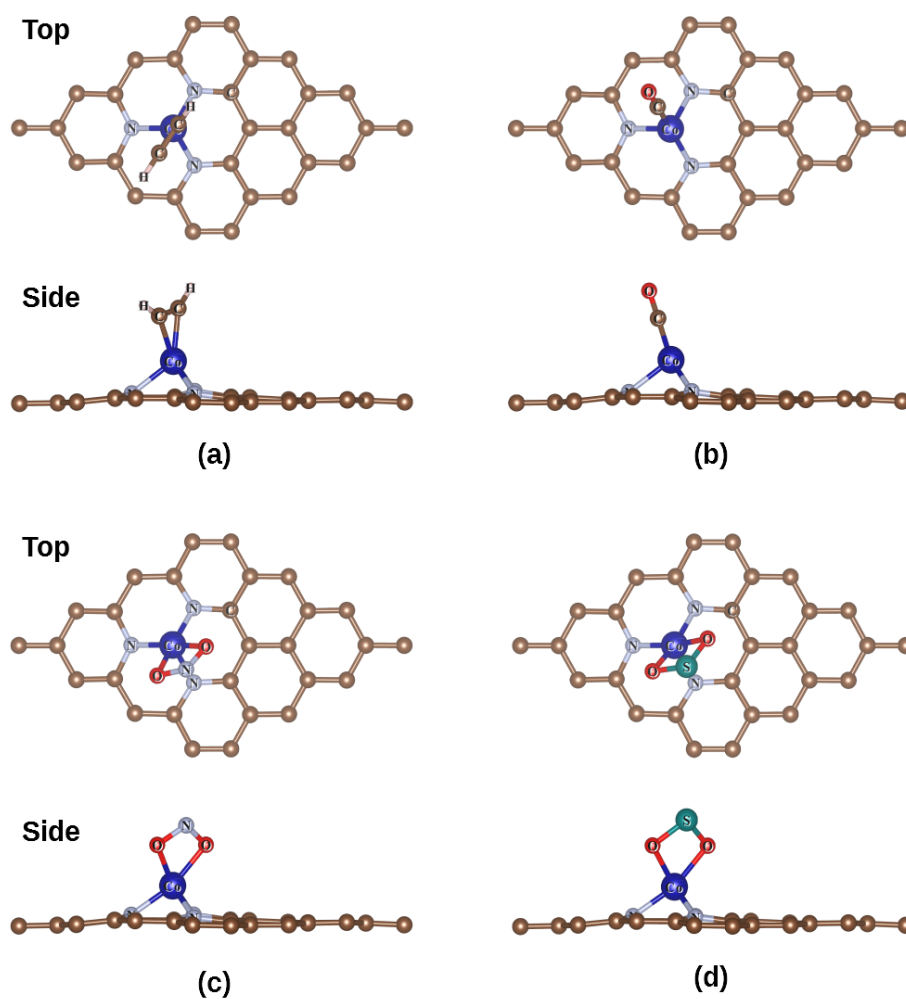

**Figure S1.** The top and side view of configurations of Co/N<sub>3</sub>-gra with (a) C<sub>2</sub>H<sub>2</sub>, (b) CO, (c) NO<sub>2</sub>, and (d) SO<sub>2</sub> adsorbed on it.

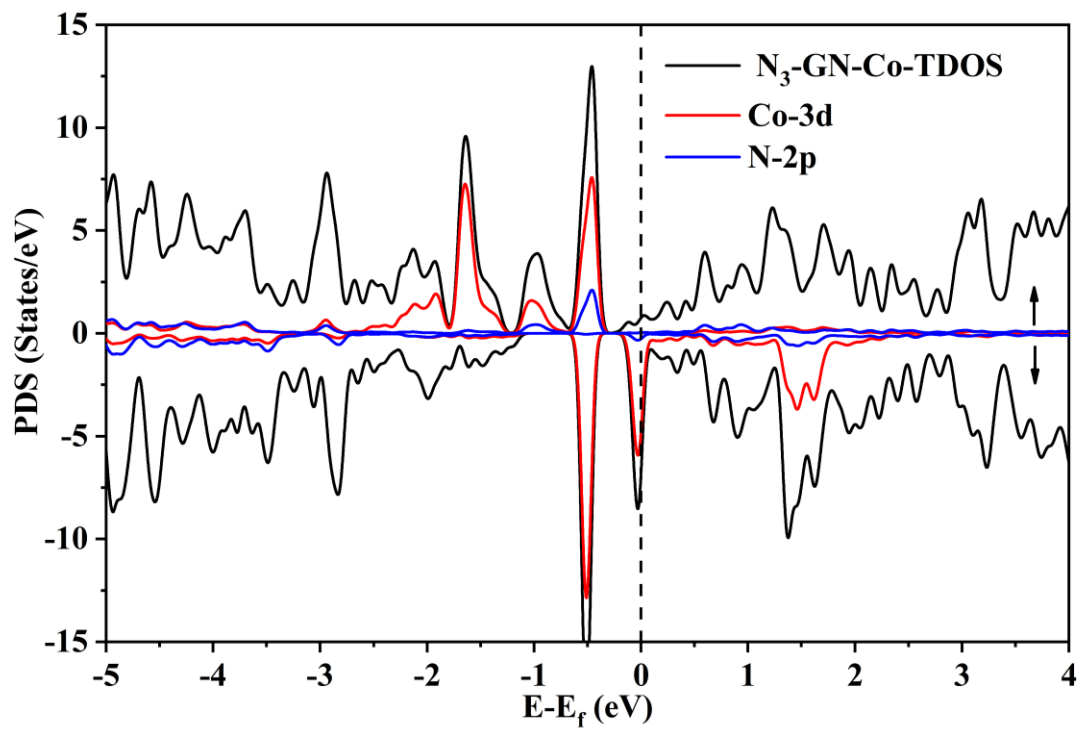

**Figure S2.** The density of states of Co/N<sub>3</sub>-gra, with the up (down) spin denoted as ↑ (↓). The dotted line indicates the Fermi level.
